# Supplementary material
Source: publisher figshare collection journal article supplement (https://acs.figshare.com/ndownloader/files/4283851)
Supplement: Supplementary file 1 [file 4283851]

# Supplementary Material

## High-accuracy theoretical thermochemistry of atmospherically important sulfur-containing molecules

Balázs Nagy,<sup>\*,†,‡</sup> Péter Szakács,<sup>†</sup> József Csontos,<sup>†</sup> Zoltán Rolik,<sup>†</sup> Gyula Tasi,<sup>‡</sup>  
and Mihály Kállay<sup>†</sup>

*Department of Physical Chemistry and Materials Science, Budapest University of Technology and  
Economics, Budapest P.O.Box 91, H-1521 Hungary, and Department of Applied and  
Environmental Chemistry, University of Szeged, Rerrich B. tér 1., H-6720, Szeged, Hungary*

E-mail: n.balazs@chem.u-szeged.hu

---

<sup>\*</sup>To whom correspondence should be addressed

<sup>†</sup>Budapest University of Technology and Economics

<sup>‡</sup>University of Szeged

**Table 1: Contributions to the total energies for the species studied in this work. All values are in atomic units.**

| Species            | $E_{\text{HF}}^{\text{a}}$ | $\Delta E_{\text{CCSD(T)}}^{\text{b}}$ | $\Delta E_{\text{CCSDT(Q)}}^{\text{c}}$ | $\Delta E_{\text{core}}^{\text{d}}$ | $\Delta E_{\text{ZPE}}^{\text{e}}$ | $\Delta E_{\text{DBOC}}^{\text{f}}$ | $\Delta E_{\text{REL}}^{\text{g}}$ | Total       |
|--------------------|----------------------------|----------------------------------------|-----------------------------------------|-------------------------------------|------------------------------------|-------------------------------------|------------------------------------|-------------|
| HSO                | -472.992011                | -0.489026                              | -0.002240                               | -0.493830                           | 0.010312                           | 0.008578                            | -1.166381                          | -475.124597 |
| HOS                | -472.994366                | -0.483176                              | -0.001766                               | -0.493784                           | 0.013127                           | 0.008553                            | -1.166620                          | -475.118032 |
| HOSO <sub>2</sub>  | -622.776220                | -1.049757                              | -0.002731 <sup>h</sup>                  | -0.620804                           | 0.022254                           | 0.013297                            | -1.275932                          | -625.690012 |
| trans-HSNO         | -527.403071                | -0.739828                              | -0.004347                               | -0.553842                           | 0.014798                           | 0.010583                            | -1.197979                          | -529.873686 |
| cis-HSNO           | -527.402186                | -0.739293                              | -0.004200                               | -0.553854                           | 0.014586                           | 0.010582                            | -1.198000                          | -529.872366 |
| SH                 | -398.110827                | -0.204179                              | -0.001046                               | -0.430225                           | 0.006080                           | 0.006099                            | -1.112194                          | -399.846291 |
| CH <sub>2</sub> SO | -511.440346                | -0.703443                              | -0.003053                               | -0.551792                           | 0.028665                           | 0.010436                            | -1.182216                          | -513.841750 |
| CH <sub>2</sub> SH | -437.140131                | -0.417342                              | -0.001793                               | -0.488212                           | 0.032582                           | 0.008288                            | -1.126960                          | -439.133634 |
| SCSOH              | -908.394168                | -0.886398                              | -0.004208 <sup>h</sup>                  | -0.981995                           | 0.019413                           | 0.015970                            | -2.293658                          | -912.525083 |
| S <sub>2</sub> COH | -908.437105                | -0.879630                              | 0.012033 <sup>h</sup>                   | -0.981912                           | 0.021882                           | 0.015968                            | -2.293870                          | -912.542634 |
| C                  | -37.693785                 | -0.095914                              | -0.000497                               | -0.055802                           | 0.000000                           | 0.001710                            | -0.016425                          | -37.860713  |
| S                  | -397.513315                | -0.162177                              | -0.000923                               | -0.429887                           | 0.000000                           | 0.005813                            | -1.112536                          | -399.213024 |
| H <sub>2</sub>     | -1.133661                  | -0.040912                              | 0.000000                                | 0.000000                            | 0.009929                           | 0.000522                            | -0.000013                          | -1.164135   |
| O <sub>2</sub>     | -149.691988                | -0.510187                              | -0.001789                               | -0.126490                           | 0.003643                           | 0.004874                            | -0.110954                          | -150.432893 |
| N <sub>2</sub>     | -108.993235                | -0.429838                              | -0.001512                               | -0.120889                           | 0.005380                           | 0.004127                            | -0.062717                          | -109.598684 |

Continued on Next Page...

Table 1 – Continued

| Species | $E_{\text{HF}}^{\text{a}}$ | $\Delta E_{\text{CCSD(T)}}^{\text{b}}$ | $\Delta E_{\text{CCSDT(Q)}}^{\text{c}}$ | $\Delta E_{\text{core}}^{\text{d}}$ | $\Delta E_{\text{ZPE}}^{\text{e}}$ | $\Delta E_{\text{DBOC}}^{\text{f}}$ | $\Delta E_{\text{REL}}^{\text{g}}$ | Total |
|---------|----------------------------|----------------------------------------|-----------------------------------------|-------------------------------------|------------------------------------|-------------------------------------|------------------------------------|-------|
|---------|----------------------------|----------------------------------------|-----------------------------------------|-------------------------------------|------------------------------------|-------------------------------------|------------------------------------|-------|

<sup>a</sup>  $E_{\text{HF}}$  was obtained by extrapolating aug-cc-pV(X+d)Z (X=T,Q,5) energies.

<sup>b</sup>  $\Delta E_{\text{CCSD(T)}}$  is the valence correlation energy calculated by the CCSD(T) method and extrapolated to the basis set limit using aug-cc-pV(X+d)Z (X = Q,5) results.

<sup>c</sup> Unless otherwise noted,  $\Delta E_{\text{CCSDT(Q)}}$  is obtained by subtracting  $E_{\text{CCSD(T)}}$  from  $E_{\text{CCSDT(Q)}}$  calculated with the cc-pV(T+d)Z basis set.

<sup>d</sup>  $\Delta E_{\text{core}}$  is the core-correlation energy defined as the extrapolated difference between the frozen-core and all-electron CCSD(T) energies. The cc-pCVTZ and the cc-pCVQZ basis sets were used.

<sup>e</sup>  $\Delta E_{\text{ZPE}}$  values were determined from all-electron CCSD(T) calculations. For harmonic frequencies and anharmonic contributions the cc-pVQZ and cc-pVTZ basis sets were used, respectively.

<sup>f</sup>  $\Delta E_{\text{DBOC}}$  was calculated at the CCSD/cc-pCVTZ level.

<sup>g</sup>  $\Delta E_{\text{REL}}$  was obtained at the CCSD(T)/cc-pCVTZ level, and it includes the spin-orbit corrections for S and C atoms as well as for SH, which are  $-892$ ,  $-135$ , and  $-859 \mu E_h$ , respectively.

<sup>h</sup>  $\Delta E_{\text{CCSDT(Q)}}$  was estimated using a reduced virtual space (see text).

**Table 2: Calculated bond lengths (in Å), bond angles, dihedral angles (in degrees), rotational constants (in GHz), harmonic vibrational frequencies (in  $\text{cm}^{-1}$ ), anharmonicity constants (in  $\text{cm}^{-1}$ ), and  $G_0$  terms (in  $\text{cm}^{-1}$ ) for the species studied in this work.**

| Species                        | Bond lengths              | Bond angles                              | Dihedral angles                            | Rotational<br>constants | Harmonic vibrational<br>frequencies | Anharmonicity<br>constants | $G_0$ |
|--------------------------------|---------------------------|------------------------------------------|--------------------------------------------|-------------------------|-------------------------------------|----------------------------|-------|
| HSO                            | $R(\text{SO})= 1.50169$   | $\langle(\text{OSH})= 104.46$            |                                            | 19.091                  | $\omega_1 = 1029$                   | $x_{11} = -6.4$            | -4.4  |
|                                | $R(\text{SH})= 1.36721$   |                                          |                                            | 20.383                  | $\omega_2 = 1103$                   | $x_{12} = -14.2$           |       |
|                                |                           |                                          |                                            | 301.253                 | $\omega_3 = 2450$                   | $x_{13} = 2.3$             |       |
|                                |                           |                                          |                                            |                         |                                     | $x_{22} = -3.9$            |       |
|                                |                           |                                          |                                            |                         |                                     | $x_{23} = -13.4$           |       |
| SOH                            |                           |                                          |                                            |                         |                                     | $x_{33} = -58.6$           |       |
|                                | $R(\text{SO})= 1.63627$   | $\langle(\text{SOH})= 107.82$            |                                            | 16.164                  | $\omega_1 = 858$                    | $x_{11} = -4.8$            | -10.1 |
|                                | $R(\text{OH})= 0.96193$   |                                          |                                            | 16.575                  | $\omega_2 = 1193$                   | $x_{12} = -5.7$            |       |
|                                |                           |                                          |                                            | 652.125                 | $\omega_3 = 3798$                   | $x_{13} = -1.5$            |       |
|                                |                           |                                          |                                            |                         |                                     | $x_{22} = -9.8$            |       |
| HOSO <sub>2</sub> <sup>a</sup> |                           |                                          |                                            |                         |                                     | $x_{23} = -21.1$           |       |
|                                |                           |                                          |                                            |                         |                                     | $x_{33} = -89.6$           |       |
| HOSO <sub>2</sub> <sup>a</sup> | $R(\text{SO}_1)= 1.61371$ | $\langle(\text{HO}_1\text{S})= 107.34$   | $D(\text{O}_2\text{SO}_1\text{H})= 26.09$  | 4.898                   | $\omega_1 = 301$                    | $x_{11} = 1.5$             | -4.5  |
|                                | $R(\text{SO}_2)= 1.44671$ | $\langle(\text{O}_1\text{SO}_2)= 107.95$ | $D(\text{O}_3\text{SO}_1\text{H})= 159.84$ | 9.039                   | $\omega_2 = 432$                    | $x_{12} = -12.1$           |       |

Continued on Next Page...

Table 2 – Continued

| Species | Bond lengths               | Bond angles                               | Dihedral angles | Rotational<br>constants | Harmonic vibrational<br>frequencies | Anharmonicity<br>constants | $G_0$ |
|---------|----------------------------|-------------------------------------------|-----------------|-------------------------|-------------------------------------|----------------------------|-------|
|         | $R(\text{SO}_3) = 1.43848$ | $\langle(\text{O}_1\text{SO}_3) = 105.77$ |                 | 9.380                   | $\omega_3 = 435$                    | $x_{13} = -5.7$            |       |
|         | $R(\text{HO}_1) = 0.96582$ | $\langle(\text{O}_2\text{SO}_3) = 123.33$ |                 |                         | $\omega_4 = 539$                    | $x_{14} = -3.7$            |       |
|         |                            |                                           |                 |                         | $\omega_5 = 794$                    | $x_{15} = -4.4$            |       |
|         |                            |                                           |                 |                         | $\omega_6 = 1122$                   | $x_{16} = -0.7$            |       |
|         |                            |                                           |                 |                         | $\omega_7 = 1136$                   | $x_{17} = 6.8$             |       |
|         |                            |                                           |                 |                         | $\omega_8 = 1347$                   | $x_{18} = -4.5$            |       |
|         |                            |                                           |                 |                         | $\omega_9 = 3783$                   | $x_{19} = -6.7$            |       |
|         |                            |                                           |                 |                         |                                     | $x_{22} = -1.3$            |       |
|         |                            |                                           |                 |                         |                                     | $x_{23} = -1.1$            |       |
|         |                            |                                           |                 |                         |                                     | $x_{24} = -1.2$            |       |
|         |                            |                                           |                 |                         |                                     | $x_{25} = -4.4$            |       |
|         |                            |                                           |                 |                         |                                     | $x_{26} = -0.8$            |       |
|         |                            |                                           |                 |                         |                                     | $x_{27} = 0.4$             |       |
|         |                            |                                           |                 |                         |                                     | $x_{28} = -1.6$            |       |
|         |                            |                                           |                 |                         |                                     | $x_{29} = -2.6$            |       |

Continued on Next Page...

Table 2 – Continued

| Species | Bond lengths | Bond angles | Dihedral angles | Rotational<br>constants | Harmonic vibrational<br>frequencies | Anharmonicity<br>constants | $G_0$ |
|---------|--------------|-------------|-----------------|-------------------------|-------------------------------------|----------------------------|-------|
|         |              |             |                 |                         |                                     | $x_{33} = -0.1$            |       |
|         |              |             |                 |                         |                                     | $x_{34} = -0.8$            |       |
|         |              |             |                 |                         |                                     | $x_{35} = -2.7$            |       |
|         |              |             |                 |                         |                                     | $x_{36} = -2.8$            |       |
|         |              |             |                 |                         |                                     | $x_{37} = 0.1$             |       |
|         |              |             |                 |                         |                                     | $x_{38} = -3.5$            |       |
|         |              |             |                 |                         |                                     | $x_{39} = -0.4$            |       |
|         |              |             |                 |                         |                                     | $x_{44} = -0.4$            |       |
|         |              |             |                 |                         |                                     | $x_{45} = -2.5$            |       |
|         |              |             |                 |                         |                                     | $x_{46} = -2.7$            |       |
|         |              |             |                 |                         |                                     | $x_{47} = 1.7$             |       |
|         |              |             |                 |                         |                                     | $x_{48} = -4.0$            |       |
|         |              |             |                 |                         |                                     | $x_{49} = -0.3$            |       |
|         |              |             |                 |                         |                                     | $x_{55} = -5.7$            |       |
|         |              |             |                 |                         |                                     | $x_{56} = -1.5$            |       |

Continued on Next Page...

Table 2 – Continued

| Species    | Bond lengths             | Bond angles                    | Dihedral angles           | Rotational<br>constants | Harmonic vibrational<br>frequencies | Anharmonicity<br>constants | $G_0$ |
|------------|--------------------------|--------------------------------|---------------------------|-------------------------|-------------------------------------|----------------------------|-------|
|            |                          |                                |                           |                         |                                     | $x_{57} = -5.2$            |       |
|            |                          |                                |                           |                         |                                     | $x_{58} = -0.2$            |       |
|            |                          |                                |                           |                         |                                     | $x_{59} = -0.9$            |       |
|            |                          |                                |                           |                         |                                     | $x_{66} = -4.1$            |       |
|            |                          |                                |                           |                         |                                     | $x_{67} = -1.5$            |       |
|            |                          |                                |                           |                         |                                     | $x_{68} = -14.6$           |       |
|            |                          |                                |                           |                         |                                     | $x_{69} = -0.9$            |       |
|            |                          |                                |                           |                         |                                     | $x_{77} = -7.9$            |       |
|            |                          |                                |                           |                         |                                     | $x_{78} = -6.4$            |       |
|            |                          |                                |                           |                         |                                     | $x_{79} = -21.9$           |       |
|            |                          |                                |                           |                         |                                     | $x_{88} = -6.0$            |       |
|            |                          |                                |                           |                         |                                     | $x_{89} = -2.5$            |       |
|            |                          |                                |                           |                         |                                     | $x_{99} = -82.4$           |       |
| trans-HSNO | $R(\text{SH}) = 1.33693$ | $\langle(\text{HSN}) = 90.33$  | $D(\text{ONSH}) = 180.00$ | 5.739                   | $\omega_1 = 320$                    | $x_{11} = 0.3$             | -3.8  |
|            | $R(\text{SN}) = 1.85183$ | $\langle(\text{ONS}) = 114.53$ |                           | 6.244                   | $\omega_2 = 391$                    | $x_{12} = -2.6$            |       |

Continued on Next Page...

Table 2 – Continued

| Species | Bond lengths             | Bond angles | Dihedral angles | Rotational<br>constants | Harmonic vibrational<br>frequencies                                            | Anharmonicity<br>constants                                                                                                                                                                                                                                                             | $G_0$ |
|---------|--------------------------|-------------|-----------------|-------------------------|--------------------------------------------------------------------------------|----------------------------------------------------------------------------------------------------------------------------------------------------------------------------------------------------------------------------------------------------------------------------------------|-------|
|         | $R(\text{NO}) = 1.17645$ |             |                 | 70.926                  | $\omega_3 = 574$<br>$\omega_4 = 919$<br>$\omega_5 = 1642$<br>$\omega_6 = 2716$ | $x_{13} = -3.4$<br>$x_{14} = -5.2$<br>$x_{15} = 6.6$<br>$x_{16} = -1.4$<br>$x_{22} = -6.8$<br>$x_{23} = -2.0$<br>$x_{24} = -4.1$<br>$x_{25} = 4.2$<br>$x_{26} = -5.8$<br>$x_{33} = -4.0$<br>$x_{34} = -14.5$<br>$x_{35} = 7.0$<br>$x_{36} = -3.4$<br>$x_{44} = -4.6$<br>$x_{45} = 4.5$ |       |

 $\infty$ 

Continued on Next Page...



Table 2 – Continued

| Species  | Bond lengths             | Bond angles                    | Dihedral angles         | Rotational<br>constants | Harmonic vibrational<br>frequencies | Anharmonicity<br>constants | $G_0$ |
|----------|--------------------------|--------------------------------|-------------------------|-------------------------|-------------------------------------|----------------------------|-------|
|          |                          |                                |                         |                         |                                     | $x_{46} = -14.7$           |       |
|          |                          |                                |                         |                         |                                     | $x_{55} = -18.2$           |       |
|          |                          |                                |                         |                         |                                     | $x_{56} = -0.9$            |       |
|          |                          |                                |                         |                         |                                     | $x_{66} = -48.1$           |       |
| cis-HSNO | $R(\text{SH}) = 1.34355$ | $\langle(\text{HSN}) = 95.11$  | $D(\text{ONSH}) = 0.00$ | 5.834                   | $\omega_1 = 337$                    | $x_{11} = -0.5$            | -5.3  |
|          | $R(\text{SN}) = 1.83490$ | $\langle(\text{ONS}) = 115.83$ |                         | 6.384                   | $\omega_2 = 420$                    | $x_{12} = -6.9$            |       |
|          | $R(\text{NO}) = 1.18029$ |                                |                         | 67.784                  | $\omega_3 = 528$                    | $x_{13} = -6.4$            |       |
|          |                          |                                |                         |                         | $\omega_4 = 899$                    | $x_{14} = -7.1$            |       |
|          |                          |                                |                         |                         | $\omega_5 = 1620$                   | $x_{15} = 11.3$            |       |
|          |                          |                                |                         |                         | $\omega_6 = 2661$                   | $x_{16} = -0.3$            |       |
|          |                          |                                |                         |                         |                                     | $x_{22} = -10.4$           |       |
|          |                          |                                |                         |                         |                                     | $x_{23} = 1.3$             |       |
|          |                          |                                |                         |                         |                                     | $x_{24} = -2.4$            |       |
|          |                          |                                |                         |                         |                                     | $x_{25} = 7.1$             |       |
|          |                          |                                |                         |                         |                                     | $x_{26} = 0.7$             |       |

Continued on Next Page...

Table 2 – Continued

| Species                         | Bond lengths                      | Bond angles                             | Dihedral angles                    | Rotational<br>constants | Harmonic vibrational<br>frequencies | Anharmonicity<br>constants                                                                                                                                                                  | $G_0$ |
|---------------------------------|-----------------------------------|-----------------------------------------|------------------------------------|-------------------------|-------------------------------------|---------------------------------------------------------------------------------------------------------------------------------------------------------------------------------------------|-------|
|                                 |                                   |                                         |                                    |                         |                                     | $x_{33} = -1.6$<br>$x_{34} = -3.9$<br>$x_{35} = 3.8$<br>$x_{36} = -5.5$<br>$x_{44} = -4.8$<br>$x_{45} = 5.1$<br>$x_{46} = -12.6$<br>$x_{55} = -18.2$<br>$x_{56} = -2.0$<br>$x_{66} = -49.3$ |       |
| SH                              | $R(\text{SH}) = 1.34175$          |                                         |                                    | 287.322<br>287.322      | $\omega_1 = 2690$                   | $x_{11} = -48.3$                                                                                                                                                                            | 1.5   |
| CH <sub>2</sub> SO <sup>b</sup> | $R(\text{SO}) = 1.47336$          | $\langle(\text{CSO}) = 114.69$          | $D(\text{H}_1\text{CSO}) = 0.00$   | 7.596                   | $\omega_1 = 390$                    | $x_{11} = 0.7$                                                                                                                                                                              | 25.3  |
|                                 | $R(\text{SC}) = 1.61317$          | $\langle(\text{H}_1\text{CS}) = 122.96$ | $D(\text{H}_2\text{CSO}) = 180.00$ | 9.374                   | $\omega_2 = 642$                    | $x_{12} = 0.3$                                                                                                                                                                              |       |
|                                 | $R(\text{H}_1\text{C}) = 1.07911$ | $\langle(\text{H}_2\text{CS}) = 115.48$ |                                    | 40.058                  | $\omega_3 = 780$                    | $x_{13} = 0.5$                                                                                                                                                                              |       |

Continued on Next Page...

Table 2 – Continued

| Species | Bond lengths                      | Bond angles | Dihedral angles | Rotational<br>constants | Harmonic vibrational<br>frequencies | Anharmonicity<br>constants | $G_0$ |
|---------|-----------------------------------|-------------|-----------------|-------------------------|-------------------------------------|----------------------------|-------|
|         | $R(\text{H}_2\text{C}) = 1.07921$ |             |                 |                         | $\omega_4 = 879$                    | $x_{14} = -0.5$            |       |
|         |                                   |             |                 |                         | $\omega_5 = 997$                    | $x_{15} = -1.8$            |       |
|         |                                   |             |                 |                         | $\omega_6 = 1193$                   | $x_{16} = -2.7$            |       |
|         |                                   |             |                 |                         | $\omega_7 = 1416$                   | $x_{17} = -0.3$            |       |
|         |                                   |             |                 |                         | $\omega_8 = 3160$                   | $x_{18} = -1.5$            |       |
|         |                                   |             |                 |                         | $\omega_9 = 3287$                   | $x_{19} = -1.8$            |       |
|         |                                   |             |                 |                         |                                     | $x_{22} = -2.5$            |       |
|         |                                   |             |                 |                         |                                     | $x_{23} = 72.6$            |       |
|         |                                   |             |                 |                         |                                     | $x_{24} = 0.5$             |       |
|         |                                   |             |                 |                         |                                     | $x_{25} = -3.9$            |       |
|         |                                   |             |                 |                         |                                     | $x_{26} = -3.2$            |       |
|         |                                   |             |                 |                         |                                     | $x_{27} = -72.1$           |       |
|         |                                   |             |                 |                         |                                     | $x_{28} = -5.3$            |       |
|         |                                   |             |                 |                         |                                     | $x_{29} = -4.3$            |       |
|         |                                   |             |                 |                         |                                     | $x_{33} = 4.3$             |       |

Continued on Next Page...

Table 2 – Continued

| Species | Bond lengths | Bond angles | Dihedral angles | Rotational<br>constants | Harmonic vibrational<br>frequencies | Anharmonicity<br>constants | $G_0$ |
|---------|--------------|-------------|-----------------|-------------------------|-------------------------------------|----------------------------|-------|
|         |              |             |                 |                         |                                     | $x_{34} = 2.0$             |       |
|         |              |             |                 |                         |                                     | $x_{35} = -2.9$            |       |
|         |              |             |                 |                         |                                     | $x_{36} = 0.2$             |       |
|         |              |             |                 |                         |                                     | $x_{37} = -106.6$          |       |
|         |              |             |                 |                         |                                     | $x_{38} = -10.6$           |       |
|         |              |             |                 |                         |                                     | $x_{39} = -18.0$           |       |
|         |              |             |                 |                         |                                     | $x_{44} = -1.5$            |       |
|         |              |             |                 |                         |                                     | $x_{45} = -2.6$            |       |
|         |              |             |                 |                         |                                     | $x_{46} = -3.1$            |       |
|         |              |             |                 |                         |                                     | $x_{47} = -8.7$            |       |
|         |              |             |                 |                         |                                     | $x_{48} = -7.7$            |       |
|         |              |             |                 |                         |                                     | $x_{49} = -9.0$            |       |
|         |              |             |                 |                         |                                     | $x_{55} = -3.6$            |       |
|         |              |             |                 |                         |                                     | $x_{56} = -3.5$            |       |
|         |              |             |                 |                         |                                     | $x_{57} = -5.5$            |       |

Continued on Next Page...

Table 2 – Continued

| Species                         | Bond lengths                      | Bond angles                             | Dihedral angles                      | Rotational<br>constants | Harmonic vibrational<br>frequencies | Anharmonicity<br>constants | $G_0$ |
|---------------------------------|-----------------------------------|-----------------------------------------|--------------------------------------|-------------------------|-------------------------------------|----------------------------|-------|
|                                 |                                   |                                         |                                      |                         |                                     | $x_{58} = -3.4$            |       |
|                                 |                                   |                                         |                                      |                         |                                     | $x_{59} = -3.2$            |       |
|                                 |                                   |                                         |                                      |                         |                                     | $x_{66} = -6.1$            |       |
|                                 |                                   |                                         |                                      |                         |                                     | $x_{67} = -1.2$            |       |
|                                 |                                   |                                         |                                      |                         |                                     | $x_{68} = -1.0$            |       |
|                                 |                                   |                                         |                                      |                         |                                     | $x_{69} = -1.1$            |       |
|                                 |                                   |                                         |                                      |                         |                                     | $x_{77} = -8.7$            |       |
|                                 |                                   |                                         |                                      |                         |                                     | $x_{78} = -5.8$            |       |
|                                 |                                   |                                         |                                      |                         |                                     | $x_{79} = -21.0$           |       |
|                                 |                                   |                                         |                                      |                         |                                     | $x_{88} = -27.8$           |       |
|                                 |                                   |                                         |                                      |                         |                                     | $x_{89} = -112.5$          |       |
|                                 |                                   |                                         |                                      |                         |                                     | $x_{99} = -30.9$           |       |
| CH <sub>2</sub> SH <sup>c</sup> | $R(\text{H}_1\text{S}) = 1.33711$ | $\langle(\text{H}_1\text{SC}) = 97.63$  | $D(\text{H}_1\text{SCH}_2) = 0.00$   | 14.121                  | $\omega_1 = 94$                     | $x_{11} = 625.5$           | 157.9 |
|                                 | $R(\text{SC}) = 1.71659$          | $\langle(\text{H}_2\text{CS}) = 121.56$ | $D(\text{H}_1\text{SCH}_3) = 180.00$ | 15.638                  | $\omega_2 = 347$                    | $x_{12} = 324.4$           |       |
|                                 | $R(\text{H}_2\text{S}) = 1.07343$ | $\langle(\text{H}_3\text{CS}) = 116.98$ |                                      | 145.632                 | $\omega_3 = 785$                    | $x_{13} = 14.4$            |       |

Continued on Next Page...

Table 2 – Continued

| Species | Bond lengths                      | Bond angles                               | Dihedral angles | Rotational<br>constants | Harmonic vibrational<br>frequencies | Anharmonicity<br>constants | $G_0$ |
|---------|-----------------------------------|-------------------------------------------|-----------------|-------------------------|-------------------------------------|----------------------------|-------|
|         | $R(\text{H}_3\text{S}) = 1.07439$ | $\langle(\text{H}_2\text{CH}_3) = 121.46$ |                 |                         | $\omega_4 = 857$                    | $x_{14} = -20.4$           |       |
|         |                                   |                                           |                 |                         | $\omega_5 = 1076$                   | $x_{15} = 15.0$            |       |
|         |                                   |                                           |                 |                         | $\omega_6 = 1425$                   | $x_{16} = 1.0$             |       |
|         |                                   |                                           |                 |                         | $\omega_7 = 2709$                   | $x_{17} = -25.2$           |       |
|         |                                   |                                           |                 |                         | $\omega_8 = 3202$                   | $x_{18} = -79.1$           |       |
|         |                                   |                                           |                 |                         | $\omega_9 = 3331$                   | $x_{19} = -86.9$           |       |
|         |                                   |                                           |                 |                         |                                     | $x_{22} = 18.7$            |       |
|         |                                   |                                           |                 |                         |                                     | $x_{23} = -0.2$            |       |
|         |                                   |                                           |                 |                         |                                     | $x_{24} = -37.8$           |       |
|         |                                   |                                           |                 |                         |                                     | $x_{25} = -0.4$            |       |
|         |                                   |                                           |                 |                         |                                     | $x_{26} = 1.2$             |       |
|         |                                   |                                           |                 |                         |                                     | $x_{27} = -11.4$           |       |
|         |                                   |                                           |                 |                         |                                     | $x_{28} = -57.0$           |       |
|         |                                   |                                           |                 |                         |                                     | $x_{29} = -32.0$           |       |
|         |                                   |                                           |                 |                         |                                     | $x_{33} = 0.5$             |       |

Continued on Next Page...

Table 2 – Continued

| Species | Bond lengths | Bond angles | Dihedral angles | Rotational<br>constants | Harmonic vibrational<br>frequencies | Anharmonicity<br>constants | $G_0$ |
|---------|--------------|-------------|-----------------|-------------------------|-------------------------------------|----------------------------|-------|
|         |              |             |                 |                         |                                     | $x_{34} = -0.9$            |       |
|         |              |             |                 |                         |                                     | $x_{35} = -5.5$            |       |
|         |              |             |                 |                         |                                     | $x_{36} = -5.0$            |       |
|         |              |             |                 |                         |                                     | $x_{37} = -4.8$            |       |
|         |              |             |                 |                         |                                     | $x_{38} = -4.1$            |       |
|         |              |             |                 |                         |                                     | $x_{39} = -4.5$            |       |
|         |              |             |                 |                         |                                     | $x_{44} = -3.7$            |       |
|         |              |             |                 |                         |                                     | $x_{45} = -4.9$            |       |
|         |              |             |                 |                         |                                     | $x_{46} = -4.7$            |       |
|         |              |             |                 |                         |                                     | $x_{47} = -1.5$            |       |
|         |              |             |                 |                         |                                     | $x_{48} = -0.8$            |       |
|         |              |             |                 |                         |                                     | $x_{49} = -0.3$            |       |
|         |              |             |                 |                         |                                     | $x_{55} = -1.7$            |       |
|         |              |             |                 |                         |                                     | $x_{56} = -5.2$            |       |
|         |              |             |                 |                         |                                     | $x_{57} = -13.2$           |       |

Continued on Next Page...

Table 2 – Continued

| Species    | Bond lengths        | Bond angles                 | Dihedral angles      | Rotational<br>constants | Harmonic vibrational<br>frequencies | Anharmonicity<br>constants | $G_0$ |
|------------|---------------------|-----------------------------|----------------------|-------------------------|-------------------------------------|----------------------------|-------|
|            |                     |                             |                      |                         |                                     | $x_{58} = -4.9$            |       |
|            |                     |                             |                      |                         |                                     | $x_{59} = -5.2$            |       |
|            |                     |                             |                      |                         |                                     | $x_{66} = -7.5$            |       |
|            |                     |                             |                      |                         |                                     | $x_{67} = -1.2$            |       |
|            |                     |                             |                      |                         |                                     | $x_{68} = -5.4$            |       |
|            |                     |                             |                      |                         |                                     | $x_{69} = -20.9$           |       |
|            |                     |                             |                      |                         |                                     | $x_{77} = -48.8$           |       |
|            |                     |                             |                      |                         |                                     | $x_{78} = -0.3$            |       |
|            |                     |                             |                      |                         |                                     | $x_{79} = -0.3$            |       |
|            |                     |                             |                      |                         |                                     | $x_{88} = -28.3$           |       |
|            |                     |                             |                      |                         |                                     | $x_{89} = -113.5$          |       |
|            |                     |                             |                      |                         |                                     | $x_{99} = -31.9$           |       |
| $S_2COH^d$ | $R(S_1C) = 1.66583$ | $\langle(S_1CS_2) = 111.49$ | $D(S_1COH) = 0.00$   | 2.605                   | $\omega_1 = 275$                    | $x_{11} = -1.0$            | -12.9 |
|            | $R(S_2C) = 1.66476$ | $\langle(S_1CO) = 126.16$   | $D(S_2COH) = 180.00$ | 4.145                   | $\omega_2 = 398$                    | $x_{12} = -0.3$            |       |
|            | $R(CO) = 1.32276$   | $\langle(S_2CO) = 122.35$   |                      | 7.015                   | $\omega_3 = 501$                    | $x_{13} = 2.3$             |       |

Continued on Next Page...



Table 2 – Continued

| Species | Bond lengths             | Bond angles                   | Dihedral angles | Rotational<br>constants | Harmonic vibrational<br>frequencies | Anharmonicity<br>constants | $G_0$ |
|---------|--------------------------|-------------------------------|-----------------|-------------------------|-------------------------------------|----------------------------|-------|
|         | $R(\text{OH}) = 0.96619$ | $\angle(\text{COH}) = 107.90$ |                 |                         | $\omega_4 = 567$                    | $x_{14} = 1.7$             |       |
|         |                          |                               |                 |                         | $\omega_5 = 686$                    | $x_{15} = -1.7$            |       |
|         |                          |                               |                 |                         | $\omega_6 = 901$                    | $x_{16} = -3.6$            |       |
|         |                          |                               |                 |                         | $\omega_7 = 1298$                   | $x_{17} = -1.2$            |       |
|         |                          |                               |                 |                         | $\omega_8 = 1363$                   | $x_{18} = -1.6$            |       |
|         |                          |                               |                 |                         | $\omega_9 = 3747$                   | $x_{19} = -2.1$            |       |
|         |                          |                               |                 |                         |                                     | $x_{22} = 0.0$             |       |
|         |                          |                               |                 |                         |                                     | $x_{23} = 0.4$             |       |
|         |                          |                               |                 |                         |                                     | $x_{24} = -0.4$            |       |
|         |                          |                               |                 |                         |                                     | $x_{25} = 0.3$             |       |
|         |                          |                               |                 |                         |                                     | $x_{26} = -3.0$            |       |
|         |                          |                               |                 |                         |                                     | $x_{27} = 0.7$             |       |
|         |                          |                               |                 |                         |                                     | $x_{28} = -4.0$            |       |
|         |                          |                               |                 |                         |                                     | $x_{29} = -1.6$            |       |
|         |                          |                               |                 |                         |                                     | $x_{33} = -0.8$            |       |

Continued on Next Page...

Table 2 – Continued

| Species | Bond lengths | Bond angles | Dihedral angles | Rotational<br>constants | Harmonic vibrational<br>frequencies | Anharmonicity<br>constants | $G_0$ |
|---------|--------------|-------------|-----------------|-------------------------|-------------------------------------|----------------------------|-------|
|         |              |             |                 |                         |                                     | $x_{34} = -9.4$            |       |
|         |              |             |                 |                         |                                     | $x_{35} = -1.7$            |       |
|         |              |             |                 |                         |                                     | $x_{36} = -4.5$            |       |
|         |              |             |                 |                         |                                     | $x_{37} = -2.1$            |       |
|         |              |             |                 |                         |                                     | $x_{38} = -3.8$            |       |
|         |              |             |                 |                         |                                     | $x_{39} = -1.2$            |       |
|         |              |             |                 |                         |                                     | $x_{44} = -12.9$           |       |
|         |              |             |                 |                         |                                     | $x_{45} = -0.8$            |       |
|         |              |             |                 |                         |                                     | $x_{46} = -2.9$            |       |
|         |              |             |                 |                         |                                     | $x_{47} = 8.7$             |       |
|         |              |             |                 |                         |                                     | $x_{48} = 6.9$             |       |
|         |              |             |                 |                         |                                     | $x_{49} = -0.9$            |       |
|         |              |             |                 |                         |                                     | $x_{55} = -3.1$            |       |
|         |              |             |                 |                         |                                     | $x_{56} = -6.7$            |       |
|         |              |             |                 |                         |                                     | $x_{57} = -2.5$            |       |

Continued on Next Page...

Table 2 – Continued

| Species            | Bond lengths        | Bond angles                 | Dihedral angles       | Rotational<br>constants | Harmonic vibrational<br>frequencies | Anharmonicity<br>constants | $G_0$ |
|--------------------|---------------------|-----------------------------|-----------------------|-------------------------|-------------------------------------|----------------------------|-------|
|                    |                     |                             |                       |                         |                                     | $x_{58} = 4.4$             |       |
|                    |                     |                             |                       |                         |                                     | $x_{59} = -0.8$            |       |
|                    |                     |                             |                       |                         |                                     | $x_{66} = -3.2$            |       |
|                    |                     |                             |                       |                         |                                     | $x_{67} = -5.0$            |       |
|                    |                     |                             |                       |                         |                                     | $x_{68} = -6.7$            |       |
|                    |                     |                             |                       |                         |                                     | $x_{69} = -1.3$            |       |
|                    |                     |                             |                       |                         |                                     | $x_{77} = -9.3$            |       |
|                    |                     |                             |                       |                         |                                     | $x_{78} = -16.1$           |       |
|                    |                     |                             |                       |                         |                                     | $x_{79} = -10.5$           |       |
|                    |                     |                             |                       |                         |                                     | $x_{88} = -7.8$            |       |
|                    |                     |                             |                       |                         |                                     | $x_{89} = -14.6$           |       |
|                    |                     |                             |                       |                         |                                     | $x_{99} = -88.3$           |       |
| SCSOH <sup>e</sup> | $R(S_1C) = 1.57014$ | $\langle(S_1CS_2) = 163.27$ | $D(OS_2CS_1) = -2.93$ | 2.023                   | $\omega_1 = 102$                    | $x_{11} = 0.0$             | -9.7  |
|                    | $R(S_2C) = 1.59514$ | $\langle(CS_2O) = 110.58$   | $D(HOS_2C) = 77.22$   | 2.291                   | $\omega_2 = 216$                    | $x_{12} = 0.1$             |       |
|                    | $R(S_2O) = 1.70201$ | $\langle(S_2OH) = 107.21$   |                       | 16.488                  | $\omega_3 = 384$                    | $x_{13} = 0.7$             |       |

Continued on Next Page...

Table 2 – Continued

| Species | Bond lengths             | Bond angles | Dihedral angles | Rotational<br>constants | Harmonic vibrational<br>frequencies | Anharmonicity<br>constants | $G_0$ |
|---------|--------------------------|-------------|-----------------|-------------------------|-------------------------------------|----------------------------|-------|
|         | $R(\text{OH}) = 0.96304$ |             |                 |                         | $\omega_4 = 399$                    | $x_{14} = -2.2$            |       |
|         |                          |             |                 |                         | $\omega_5 = 612$                    | $x_{15} = 6.0$             |       |
|         |                          |             |                 |                         | $\omega_6 = 620$                    | $x_{16} = 3.1$             |       |
|         |                          |             |                 |                         | $\omega_7 = 1104$                   | $x_{17} = 2.8$             |       |
|         |                          |             |                 |                         | $\omega_8 = 1412$                   | $x_{18} = -8.8$            |       |
|         |                          |             |                 |                         | $\omega_9 = 3798$                   | $x_{19} = 0.1$             |       |
|         |                          |             |                 |                         |                                     | $x_{22} = -14.6$           |       |
|         |                          |             |                 |                         |                                     | $x_{23} = -2.8$            |       |
|         |                          |             |                 |                         |                                     | $x_{24} = -16.0$           |       |
|         |                          |             |                 |                         |                                     | $x_{25} = -4.4$            |       |
|         |                          |             |                 |                         |                                     | $x_{26} = 0.4$             |       |
|         |                          |             |                 |                         |                                     | $x_{27} = 3.0$             |       |
|         |                          |             |                 |                         |                                     | $x_{28} = 3.7$             |       |
|         |                          |             |                 |                         |                                     | $x_{29} = -4.9$            |       |
|         |                          |             |                 |                         |                                     | $x_{33} = -4.0$            |       |

Continued on Next Page...

Table 2 – Continued

| Species | Bond lengths | Bond angles | Dihedral angles | Rotational<br>constants | Harmonic vibrational<br>frequencies | Anharmonicity<br>constants | $G_0$ |
|---------|--------------|-------------|-----------------|-------------------------|-------------------------------------|----------------------------|-------|
|         |              |             |                 |                         |                                     | $x_{34} = 1.0$             |       |
|         |              |             |                 |                         |                                     | $x_{35} = -11.0$           |       |
|         |              |             |                 |                         |                                     | $x_{36} = -2.1$            |       |
|         |              |             |                 |                         |                                     | $x_{37} = -2.5$            |       |
|         |              |             |                 |                         |                                     | $x_{38} = 5.4$             |       |
|         |              |             |                 |                         |                                     | $x_{39} = -1.0$            |       |
|         |              |             |                 |                         |                                     | $x_{44} = 0.1$             |       |
|         |              |             |                 |                         |                                     | $x_{45} = -0.7$            |       |
|         |              |             |                 |                         |                                     | $x_{46} = -6.6$            |       |
|         |              |             |                 |                         |                                     | $x_{47} = 0.6$             |       |
|         |              |             |                 |                         |                                     | $x_{48} = -6.6$            |       |
|         |              |             |                 |                         |                                     | $x_{49} = -0.5$            |       |
|         |              |             |                 |                         |                                     | $x_{55} = -13.4$           |       |
|         |              |             |                 |                         |                                     | $x_{56} = -0.3$            |       |
|         |              |             |                 |                         |                                     | $x_{57} = -14.4$           |       |

Continued on Next Page...

Table 2 – Continued

| Species | Bond lengths | Bond angles | Dihedral angles | Rotational<br>constants | Harmonic vibrational<br>frequencies | Anharmonicity<br>constants | $G_0$ |
|---------|--------------|-------------|-----------------|-------------------------|-------------------------------------|----------------------------|-------|
|         |              |             |                 |                         |                                     | $x_{58} = 12.9$            |       |
|         |              |             |                 |                         |                                     | $x_{59} = -2.5$            |       |
|         |              |             |                 |                         |                                     | $x_{66} = -1.5$            |       |
|         |              |             |                 |                         |                                     | $x_{67} = 1.1$             |       |
|         |              |             |                 |                         |                                     | $x_{68} = -5.8$            |       |
|         |              |             |                 |                         |                                     | $x_{69} = 0.0$             |       |
|         |              |             |                 |                         |                                     | $x_{77} = -10.0$           |       |
|         |              |             |                 |                         |                                     | $x_{78} = 4.0$             |       |
|         |              |             |                 |                         |                                     | $x_{79} = -21.8$           |       |
|         |              |             |                 |                         |                                     | $x_{88} = -14.1$           |       |
|         |              |             |                 |                         |                                     | $x_{89} = 0.6$             |       |
|         |              |             |                 |                         |                                     | $x_{99} = -85.7$           |       |

<sup>a</sup> O<sub>1</sub>: the oxygen atom to which the hydrogen is attached, O<sub>2</sub>: *cis* position relative to the H atom, O<sub>3</sub>: *trans* position relative to the H atom

<sup>b</sup> H<sub>1</sub>: *cis* position relative to the O atom, H<sub>2</sub>: *trans* position relative to the O atom

<sup>c</sup> H<sub>1</sub>: the H atom connected to sulfur, H<sub>2</sub>: *cis* position relative to H<sub>1</sub>, H<sub>3</sub>: *trans* position relative to H<sub>1</sub>

<sup>d</sup> S<sub>1</sub>: *cis* position relative to the H atom, S<sub>2</sub>: *trans* position relative to the H atom

<sup>e</sup> S<sub>2</sub>: this sulfur atom is connected to the O atom
